# Supplementary material
Source: PubMed Central journal article supplement (PMC2791570)
Supplement: 0710860105_0710860105SI.pdf [file 0710860105_0710860105SI.pdf]

# Supporting Information

Latif and Keenlyside 10.1073/pnas.0710860105

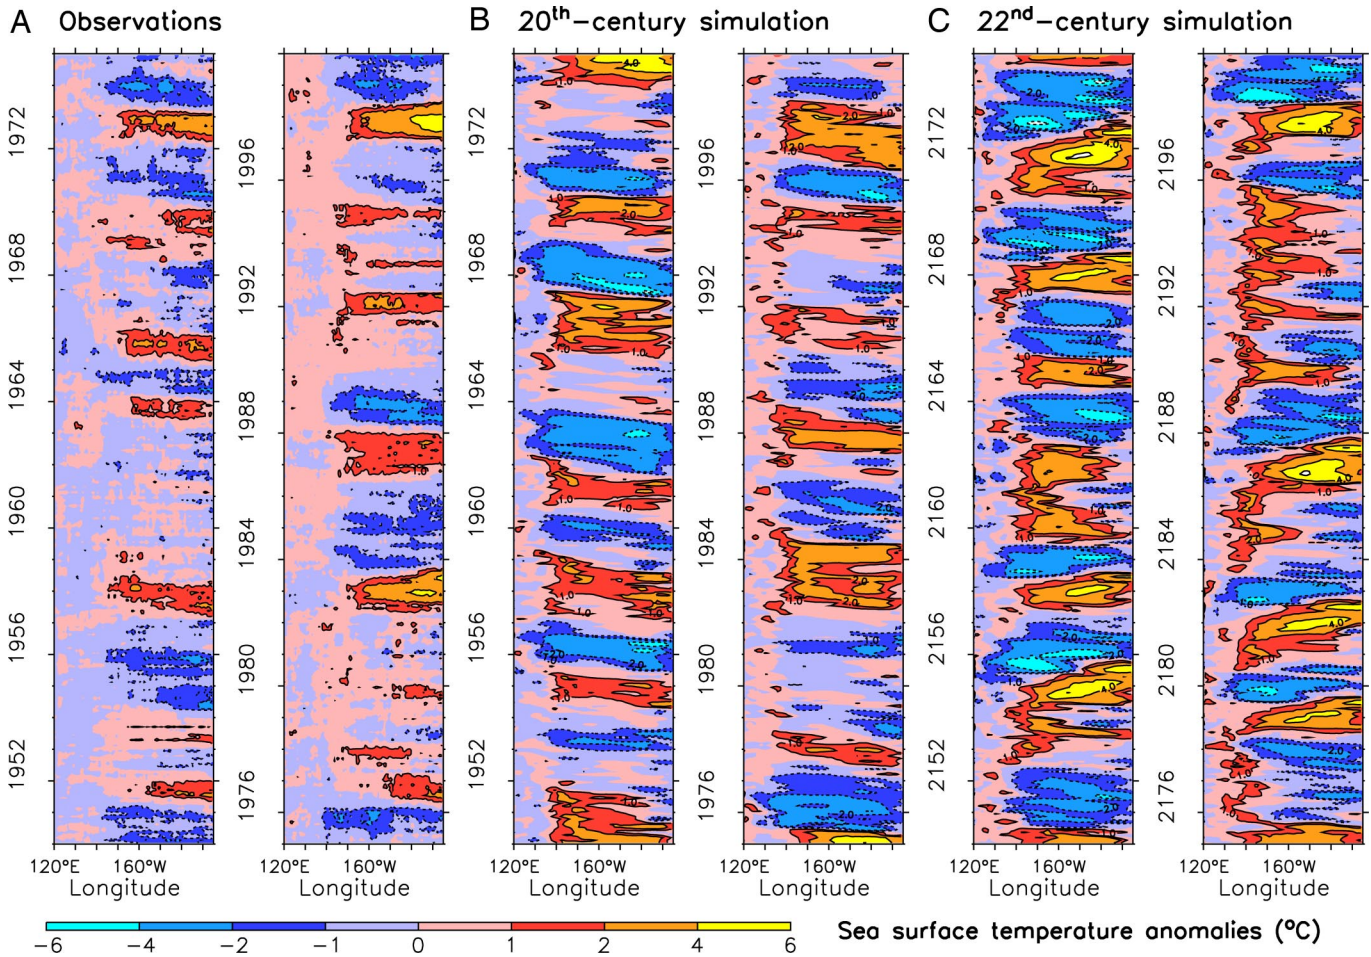

**Fig. S1.** Equatorial Pacific SST anomalies from observations [HadISST 1.1 (41)] (A), and twentieth (B) and twenty-second (C) century integrations with the global climate model from the Max Planck Institute for Meteorology (ECHAM5/MPI-OM). Greenhouse gas concentrations and sulfur emissions following observations (B) and the IPCC scenario A1B (C), in which CO<sub>2</sub> concentration increases to 700 ppm in 2100 and are constant thereafter. Note the westward-propagating SST anomalies before the mid-1970s in observations and the twentieth century simulation, and the stationary and even eastward-propagating anomalies after the mid-1970s in observations and in the twenty-second century simulation.
